# Supplementary material for: Optogenetic inhibition of actomyosin reveals mechanical bistability of the mesoderm epithelium during Drosophila mesoderm invagination
Source: eLife. 2022 Feb 23;11:e69082. doi: 10.7554/eLife.69082 (PMC8896829; doi:10.7554/eLife.69082)
Supplement: Figure 4—source data 1. [file elife-69082-fig4-data1.xlsx]

## Sheet: Measurements WT
Embryos	WT1	WT2	WT3	WT4	WT5	WT6	WT7
Time(min)	Cell length (micron)	Cell length (micron)	Cell length (micron)	Cell length (micron)	Cell length (micron)	Cell length (micron)	Cell length (micron)
0	36	35.6667	34.6667	39	38.6667	35.3333	36.3333
0.56783	36.3333	37.3333	34.6667	39.3333	39.3333	36.3333	37
1.13566	38	37	35.6667	40	40.3333	36.3333	38.3333
1.70349	40	38.6667	37.3333	40.6667	40.6667	38.3333	38.6667
2.27132	41.3333	39.6667	38.3333	42.6667	41.3333	39.3333	39
2.83915	42.6667	41.3333	40.3333	44.3333	42.3333	41	40
3.407	44.3333	42	41.6667	45.3333	42.6667	40.3333	41.3333
3.975	45	43	44	45.6667	44.6667	41.3333	42.6667
4.543	46.6667	45	45.6667	47	45.6667	42.3333	44.3333
5.111	47.6667	46	46.6667	47	47.6667	43.6667	45
5.679	49	47	47.6667	47.3333	49.3333	44.6667	46.6667
6.247	49.3333	47.6667	48.6667	48	50	46.3333	47.3333
6.815	49.3333	49.3333	49	48.6667	50.6667	47.3333	47.6667
7.383	49	50.3333	50.3333	45.6667	52	46.6667	48
7.951	52	50.3333	49.3333	45	52	47.6667	49
8.519	51.6667	50.3333	50.6667	43.6667	53.3333	47.3333	49.3333
9.087	53	51	50	42.3333	53.3333	47.3333	48.6667
9.655	52.3333	51.3333	49.6667	41.3333	53	47.6667	48
10.223	49	51.3333	47.3333	39.6667	53.6667	48.6667	46.6667
10.791	49.3333	51	47.3333	37.3333	52	48	46.6667
11.359	47.6667	49.6667	44.6667	36.6667	51.6667	46.6667	45.6667
11.927	47	49	43.6667	36.3333	47.6667	45.3333	46
12.495	46.6667	49.3333	43	35	46	44.3333	44.3333
13.063	44.6667	45.6667	40.6667	35.3333	44.3333	43	42.6667
13.631	45	45.3333	38.3333		42.6667	42	39.6667
14.199	41.6667	43.6667	38.6667		40	38.6667	39
14.767	40.6667	43.6667			39.6667	36.6667	37.6667
15.335	40.3333	42.6667			39	36.6667	34.6667
15.903	38.3333	40.6667				33.6667	35
16.471	39.3333					33	34
17.039	38.3333					32.6667	33.3333
17.607	37
18.175	36.3333
18.743	33.6667

## Sheet: Measurements Unstimulated
Embryos	Unstim1	Unstim2	Unstim3	Unstim4	Unstim5	Unstim6	Unstim7	Unstim8	Unstim9	Unstim10	Unstim11
Time(min)	Cell length (micron)	Cell length (micron)	Cell length (micron)	Cell length (micron)	Cell length (micron)	Cell length (micron)	Cell length (micron)	Cell length (micron)	Cell length (micron)	Cell length (micron)	Cell length (micron)
0	38.6663	37	36.6666	38	38.6666	39.6667	36	39.3333	37	37	40.3333
0.56783	39.3329	37.3333	37.3333	38	39.6666	40.3333	37	40.3333	37	37.6667	41
1.13566	39.6663	37.3333	38.3333	39.6667	40.6666	41.6667	37.3333	40.3333	38	38.3333	41.6667
1.70349	39.9996	37.6667	39.3333	40.3333	41.3333	42	38.3333	41	38.3333	39.6667	42.6667
2.27132	40.6663	38.3333	40.6666	41.3333	42.6666	42.3333	39.6667	41.3333	39	40.3333	44
2.83915	41.3329	39	41.6666	39.6667	42.3333	44	40.3333	41.6667	40	41.3333	43.3333
3.40698	41.9996	39.3333	40.6666	41.6667	43.6666	44.6667	42.3333	42.3333	40.3333	42.6667	44.3333
3.97481	42.9996	40.3333	42	43.6667	44	46.6667	44	42.6667	40.6667	41	45.6667
4.54264	43.6662	40.3333	42.6666	44	45.6666	47	45	43.3333	42.3333	40.6667	46.6667
5.11047	43.3329	41	44.3333	45.3333	46.3333	48.6667	45.6667	43.6667	43	42.6667	48.3333
5.6783	44.6662	41.6667	45.3333	47	48.6666	49	45.6667	45.3333	43.3333	43	49.3333
6.24613	45.3329	42.6667	46.6666	47.6667	48	50	49	46.6667	43.3333	44.3333	49.3333
6.81396	45.9995	43.6667	48	49	47.6666	51	49.6667	46.3333	45	43.6667	51
7.38179	46.9995	44.6667	47.6666	49	48.6666	50.6667	51	45.3333	46	43.6667	49.6667
7.94962	46.6662	44.6667	49	49	49.3333	50.6667	49.3333	45.6667	46	45	50.6667
8.51745	47.6662	44.6667	48	49	50	51.6667	48	44.3333	47.6667	44.6667	51.3333
9.08528	47.6662	45.6667	49	49.3333	48.6666	52.3333	46.3333		50.6667	45.6667	50.3333
9.65311	47.6662	44.3333	49	51.6667	49	51.3333	45.3333		52.6667	46	50
10.2209	48.9995	46	49.6666	50.6667	49.3333	51	43		51.6667	44.3333	48.3333
10.7888	48.3329	46	49.6666	52.3333	47	48.6667	43.3333		51	44.6667	47.6667
11.3566	47.9995	46.3333	48	49.6667	45.3333	48.6667			51.3333	42.6667	46.6667
11.9244	48.6662	47	46.3333	49	43	46.3333			51	41.3333	45.6667
12.4923	47.9995	48.3333	46	46.3333	43	44.6667			50.3333	41.6667
13.0601	48.3329	49.6667	43	47	42.6666	42			49
13.6279	46.9995	49.6667	42	44.6667	41.3333				47.6667
14.1958	46.3329	48.6667	41	41					46.6667
14.7636	45.3329	48.6667	40.3333	40.6667					46.6667
15.3314	41.6663	49.6667	39.3333	41.3333
15.8992	39.9996	49	39.3333	40.3333
16.4671	40.6663	48.6667		37.6667
17.0349	37.333	50
17.6027	37.333	48.3333
18.1706	34.9997	46.6667
18.7384	34.6663	47
19.3062		48
19.8741		47.3333
20.4419		44.3333
21.0097		41
21.5775		40
22.1454		39

## Sheet: Summary
Opto-Rho1DN control			WT				unpaired two-tailed student t-test		Opto-Rho1DN control			WT
ID	Transition(min)		ID	Transition(min)			p-value		ID	Transition(min)		ID	Transition(min)
1	12.1816		1	8.40834			0.496129		1	12.1816		1	8.40834
2	obvious outlier		2	9.07105					3	9.8788		2	9.07105
3	9.8788		3	7.79097					4	10.4053		3	7.79097
4	10.4053		4	obvious outlier					5	8.621		5	9.51013
5	8.621		5	9.51013					6	8.9721		6	10.0394
6	8.9721		6	10.0394					7	7.3818		7	8.76484
7	7.3818		7	8.76484					8	7.5689
8	7.5689		Ave	8.93079					9	11.1137
9	11.1137		STDEV	0.798005					10	9.4375
10	9.4375								11	7.9079
11	7.9079
Ave	9.34686
STDEV	1.57514
