# Supplementary material for: Optogenetic inhibition of actomyosin reveals mechanical bistability of the mesoderm epithelium during Drosophila mesoderm invagination
Source: eLife. 2022 Feb 23;11:e69082. doi: 10.7554/eLife.69082 (PMC8896829; doi:10.7554/eLife.69082)
Supplement: Figure 9—source data 1. [file elife-69082-fig9-data1.xlsx]

## Sheet: Plots-Individual embryos
	Distance from midline(um)	Velocity(um/min)
Reslice of 20190306_A-Surfview-5x
	-6	-1.19751
	-25	-1.1534
	-17.6667	-1.08931
	-10.6667	-0.999991
	-0.333333	-0.346027
	60.3333	-0.346027
	111.667	-0.296988
	104	-0.253697
	-88	-0.226258
	-33.6667	-0.221972
	-2.66667	-0.221972
	93.3333	-0.169689
	97	-0.117666
	74.6667	0
	83.6667	0
	-53	0.0544703
	1	0.113142
	51	0.163406
	5.33333	0.169689
	64.3333	0.169689
	-42.6667	0.172985
	36.6667	0.172985
	-78.3333	0.221972
	-59.6667	0.226258
	-68.3333	0.235296
	9	0.277451
	-85.6667	0.346027
	13.3333	0.529409
	41.6667	0.540227
	19.6667	0.776922
	24	1.58372
Reslice of 20190307_0-Surfview-5x
	-11.3333	-1.70589
	-18.6667	-1.69685
	-7.66667	-1.41403
	-3.66667	-1.03805
	-29	-0.84842
	-1.33333	-0.435728
	122.667	-0.411782
	115.333	-0.395935
	83.6667	-0.382824
	-40.6667	-0.346027
	107.333	-0.339367
	112.333	-0.326785
	99	-0.288331
	92.3333	-0.277451
	68.6667	-0.226258
	76	-0.169689
	62.6667	-0.110983
	-58	0
	-0.333333	0
	-72	0.0475897
	1.33333	0.0482058
	-64.3333	0.115353
	-53.6667	0.169689
	-84.6667	0.226258
	-80	0.226258
	55	0.226258
	51.3333	0.346027
	7.33333	0.388464
	43.3333	0.565632
	36	0.904986
	9.33333	0.957569
	12.3333	1.1534
	19.3333	1.27635
	25.3333	1.64025
Reslice of 20190308_0-Surfview-5x
	-22.6667	-0.980388
	85.3333	-0.791822
	75	-0.714421
	-7.66667	-0.610422
	-14.6667	-0.540227
	93.3333	-0.499466
	68.3333	-0.452477
	61.3333	-0.388464
	-31.3333	-0.35295
	-2	0.115353
	51.3333	0.115353
	-58.6667	0.226258
	-47.6667	0.294136
	-70	0.395935
	-101.667	0.452477
	-80	0.47057
	8	0.47057
	18.6667	0.529409
	42	0.565632
	-95.3333	0.667188
	29.3333	0.735275
Reslice of 20190308_A-Surfview-5x
	-44.3333	-0.622158
	87.3333	-0.452477
	-17.3333	-0.395935
	-34.6667	-0.346027
	118.667	-0.230699
	108.667	-0.172985
	-13	-0.115353
	-6.33333	-0.113142
	-25.3333	0
	94	0
	7.33333	0.113142
	13	0.169689
	-76.6667	0.235296
	-85.3333	0.288331
	-67	0.294136
	61.3333	0.395935
	-59	0.47057
	76.6667	0.480209
	34	0.529409
	67.6667	0.634342
Reslice of 20181204_C-Surfview-5x
	-31.6667	-0.961545
	-21	-0.925932
	-9.33333	-0.665947
	28.6667	-0.665947
	63.6667	-0.425556
	79.6667	-0.403672
	17	-0.388464
	71.3333	-0.372284
	-57	-0.115353
	-45.3333	-0.0588353
	-64.3333	0
	6.33333	0.226258
	9	0.226258
	-79.6667	0.230699
	-119.667	0.282786
	-103.333	0.326785
	-85	0.339367
	-113.667	0.360138
Reslice of 20181205_0-Surfview-5x
	-9.66667	-2.24909
	-18.6667	-1.97965
	-33	-1.22085
	-7.33333	-0.943395
	-43.3333	-0.87389
	56	-0.33297
	-7.33333	-0.113142
	-61.3333	0.169689
	-104.667	0.221972
	-70.6667	0.240102
	-6.66667	0.272325
	-99.6667	0.294136
	-86.6667	0.3001
	-80	0.33297
	46.6667	0.339367
	-123	0.395935
	-118	0.403672
	-113	0.411782
	-92	0.452477
	-2.33333	0.50903
	-131.667	0.519028
	-138.667	0.554939
	34	0.832429
	1.33333	0.941188
	5.33333	1.61478
	12.6667	1.72033
	17.6667	1.74071
Reslice of 20181208_D-Surfview-5x
	-18.3333	-0.749691
	87	-0.544633
	106.333	-0.544633
	92.6667	-0.499466
	100.333	-0.461361
	-30.3333	-0.443968
	110	-0.42016
	58.3333	-0.388464
	65.6667	-0.388464
	79	-0.341135
	-9.66667	-0.339367
	73.6667	-0.339367
	119.333	-0.267355
	40.6667	-0.163406
	-41	0.169689
	-71	0.346027
	3	0.461361
	-54.6667	0.519028
	-63.6667	0.678749
	-82	0.84842

## Sheet: Plots-All embryos
Distance from midline(um)	Velocity(um/min)
-138.667	0.554939
-131.667	0.519028
-123	0.395935
-119.667	0.282786
-118	0.403672
-113.667	0.360138
-113	0.411782
-104.667	0.221972
-103.333	0.326785
-101.667	0.452477
-99.6667	0.294136
-95.3333	0.667188
-92	0.452477
-88	-0.226258
-86.6667	0.3001
-85.6667	0.346027
-85.3333	0.288331
-85	0.339367
-84.6667	0.226258
-82	0.84842
-80	0.226258
-80	0.47057
-80	0.33297
-79.6667	0.230699
-78.3333	0.221972
-76.6667	0.235296
-72	0.0475897
-71	0.346027
-70.6667	0.240102
-70	0.395935
-68.3333	0.235296
-67	0.294136
-64.3333	0.115353
-64.3333	0
-63.6667	0.678749
-61.3333	0.169689
-59.6667	0.226258
-59	0.47057
-58.6667	0.226258
-58	0
-57	-0.115353
-54.6667	0.519028
-53.6667	0.169689
-53	0.0544703
-47.6667	0.294136
-45.3333	-0.0588353
-44.3333	-0.622158
-43.3333	-0.87389
-42.6667	0.172985
-41	0.169689
-40.6667	-0.346027
-34.6667	-0.346027
-33.6667	-0.221972
-33	-1.22085
-31.6667	-0.961545
-31.3333	-0.35295
-30.3333	-0.443968
-29	-0.84842
-25.3333	0
-25	-1.1534
-22.6667	-0.980388
-21	-0.925932
-18.6667	-1.69685
-18.6667	-1.97965
-18.3333	-0.749691
-17.6667	-1.08931
-17.3333	-0.395935
-14.6667	-0.540227
-13	-0.115353
-11.3333	-1.70589
-10.6667	-0.999991
-9.66667	-2.24909
-9.66667	-0.339367
-9.33333	-0.665947
-7.66667	-1.41403
-7.66667	-0.610422
-7.33333	-0.943395
-7.33333	-0.113142
-6.66667	0.272325
-6.33333	-0.113142
-6	-1.19751
-3.66667	-1.03805
-2.66667	-0.221972
-2.33333	0.50903
-2	0.115353
-1.33333	-0.435728
-0.333333	-0.346027
-0.333333	0
1	0.113142
1.33333	0.0482058
1.33333	0.941188
3	0.461361
5.33333	0.169689
5.33333	1.61478
6.33333	0.226258
7.33333	0.388464
7.33333	0.113142
8	0.47057
9	0.277451
9	0.226258
9.33333	0.957569
12.3333	1.1534
12.6667	1.72033
13	0.169689
13.3333	0.529409
17	-0.388464
17.6667	1.74071
18.6667	0.529409
19.3333	1.27635
19.6667	0.776922
24	1.58372
25.3333	1.64025
28.6667	-0.665947
29.3333	0.735275
34	0.529409
34	0.832429
36	0.904986
36.6667	0.172985
40.6667	-0.163406
41.6667	0.540227
42	0.565632
43.3333	0.565632
46.6667	0.339367
51	0.163406
51.3333	0.346027
51.3333	0.115353
55	0.226258
56	-0.33297
58.3333	-0.388464
60.3333	-0.346027
61.3333	-0.388464
61.3333	0.395935
62.6667	-0.110983
63.6667	-0.425556
64.3333	0.169689
65.6667	-0.388464
67.6667	0.634342
68.3333	-0.452477
68.6667	-0.226258
71.3333	-0.372284
73.6667	-0.339367
74.6667	0
75	-0.714421
76	-0.169689
76.6667	0.480209
79	-0.341135
79.6667	-0.403672
83.6667	0
83.6667	-0.382824
85.3333	-0.791822
87	-0.544633
87.3333	-0.452477
92.3333	-0.277451
92.6667	-0.499466
93.3333	-0.169689
93.3333	-0.499466
94	0
97	-0.117666
99	-0.288331
100.333	-0.461361
104	-0.253697
106.333	-0.544633
107.333	-0.339367
108.667	-0.172985
110	-0.42016
111.667	-0.296988
112.333	-0.326785
115.333	-0.395935
118.667	-0.230699
119.333	-0.267355
122.667	-0.411782
