# Supplementary material for: Optogenetic inhibition of actomyosin reveals mechanical bistability of the mesoderm epithelium during Drosophila mesoderm invagination
Source: eLife. 2022 Feb 23;11:e69082. doi: 10.7554/eLife.69082 (PMC8896829; doi:10.7554/eLife.69082)
Supplement: Figure 9—source data 2. [file elife-69082-fig9-data2.xlsx]

## Sheet: Individual Embryos
Distance (pixel)	Angle (degree)	Angle+90 (degree)			Note about plots:
210710_A_5x					x-axis: distance from the ventral midline (Distance), 1 pixel = 0.33 micron
156	-107.736	-17.736			y-axis: angle of the trajectories on the kymograph (a proxy of velocity)
179	-107.736	-17.736
107	-100.769	-10.769
133	-100.769	-10.769
4	-98.074	-8.074
81	-97.813	-7.813
22	-96.269	-6.269
244	-96.189	-6.189
223	-96.189	-6.189
265	-96.189	-6.189
294	-96.189	-6.189
-116	-94.586	-4.586
-104	-94.586	-4.586
-30	-93.726	-3.726
-134	-92.195	-2.195
-275	-91.695	-1.695
42	-90.945	-0.945
58	-90.945	-0.945
-80	-90.198	-0.198
-228	-90.088	-0.088
-47	-89.351	0.649
-153	-88.749	1.251
-63	-87.305	2.695
-263	-85.85	4.15
-246	-85.85	4.15
-201	-83.325	6.675
-181	-83.325	6.675
-219	-80.793	9.207
210710_B_5x
126	-90.69	-0.69
195	-90.172	-0.172
175	-90.172	-0.172
-26	-89.043	0.957
198	-87.315	2.685
44	-85.212	4.788
171	-84.928	5.072
12	-84.604	5.396
33	-84.604	5.396
-49	-84.016	5.984
-74	-83.902	6.098
60	-82.374	7.626
-94	-79.489	10.511
-183	-75.56	14.44
-243	-75.56	14.44
-225	-75.56	14.44
-208	-75.56	14.44
-159	-75.135	14.865
-144	-75.135	14.865
-119	-75.135	14.865
78	-73.786	16.214
210710_C_5x
195	-110.305	-20.305
211	-107.618	-17.618
170	-105.663	-15.663
236	-101.085	-11.085
127	-100.788	-10.788
289	-100.245	-10.245
307	-97.657	-7.657
251	-97.004	-7.004
268	-97.004	-7.004
142	-95.727	-5.727
111	-95.635	-5.635
81	-85.953	4.047
33	-84.244	5.756
17	-83.793	6.207
57	-82.118	7.882
-34	-80.367	9.633
-19	-80.367	9.633
-4	-80.367	9.633
-95	-80.275	9.725
-110	-77.666	12.334
-70	-72.714	17.286
-134	-69.05	20.95
-46	-68.7	21.3
-252	-59.176	30.824
-171	-57.265	32.735
-153	-56.47	33.53
-209	-52.911	37.089
-232	-52.911	37.089

## Sheet: All Embryos
Distance (pixel)	angle+90 (degree)	Distance (μm)	Velocity (μm/min)
156	-17.736	51.9999	-0.726888
179	-17.736	59.6666	-0.726888
107	-10.769	35.6666	-0.432268
133	-10.769	44.3333	-0.432268
4	-8.074	1.33333	-0.322402
81	-7.813	27	-0.311848
22	-6.269	7.33333	-0.249665
244	-6.189	81.3333	-0.246454
223	-6.189	74.3333	-0.246454
265	-6.189	88.3332	-0.246454
294	-6.189	97.9999	-0.246454
-116	-4.586	-38.6666	-0.182299
-104	-4.586	-34.6666	-0.182299
-30	-3.726	-9.99999	-0.148005
-134	-2.195	-44.6666	-0.0871101
-275	-1.695	-91.6666	-0.0672539
42	-0.945	14	-0.037488
58	-0.945	19.3333	-0.037488
-80	-0.198	-26.6666	-0.00785395
-228	-0.088	-75.9999	-0.00349063
-47	0.649	-15.6667	0.0257445
-153	1.251	-50.9999	0.0496304
-63	2.695	-21	0.10698
-263	4.15	-87.6666	0.164903
-246	4.15	-81.9999	0.164903
-201	6.675	-66.9999	0.265977
-181	6.675	-60.3333	0.265977
-219	9.207	-72.9999	0.368384
126	-0.69	41.9996	-0.027371
195	-0.172	64.9994	-0.00682262
175	-0.172	58.3328	-0.00682262
-26	0.957	-8.66658	0.0379642
198	2.685	65.9993	0.106582
44	4.788	14.6665	0.190365
171	5.072	56.9994	0.201715
12	5.396	3.99996	0.214674
33	5.396	10.9999	0.214674
-49	5.984	-16.3332	0.23823
-74	6.098	-24.6664	0.242802
60	7.626	19.9998	0.304294
-94	10.511	-31.333	0.421673
-183	14.44	-60.9994	0.585224
-243	14.44	-80.9992	0.585224
-225	14.44	-74.9993	0.585224
-208	14.44	-69.3326	0.585224
-159	14.865	-52.9995	0.603235
-144	14.865	-47.9995	0.603235
-119	14.865	-39.6663	0.603235
78	16.214	25.9997	0.660886
195	-20.305	64.9994	-0.840927
211	-17.618	70.3326	-0.721732
170	-15.663	56.6661	-0.637247
236	-11.085	78.6659	-0.44527
127	-10.788	42.3329	-0.433049
289	-10.245	96.3324	-0.410768
307	-7.657	102.332	-0.305546
251	-7.004	83.6658	-0.279215
268	-7.004	89.3324	-0.279215
142	-5.727	47.3329	-0.227928
111	-5.635	36.9996	-0.224243
81	4.047	26.9997	0.160797
33	5.756	10.9999	0.22909
17	6.207	5.66661	0.247176
57	7.882	18.9998	0.314637
-34	9.633	-11.3332	0.385747
-19	9.633	-6.33327	0.385747
-4	9.633	-1.33332	0.385747
-95	9.725	-31.6664	0.389502
-110	12.334	-36.6663	0.496944
-70	17.286	-23.3331	0.707261
-134	20.95	-44.6662	0.870137
-46	21.3	-15.3332	0.886093
-252	30.824	-83.9992	1.3561
-171	32.735	-56.9994	1.46102
-153	33.53	-50.9995	1.50599
-209	37.089	-69.666	1.71815
-232	37.089	-77.3326	1.71815
